# Supplementary material
Source: Research Square preprint supplement (doi:10.21203/rs.3.rs-10108839/v1)
Supplement: Supplementary file 1 [file 50a7697a35edc3e03055eb00.xlsx]

## Sheet: DATA PER-ITEM
X	: SEL
Y	: Self Regulation
Z	: Altruistic Behavior
No.	Kelompok	Kelas	Responden	X1	X2	X3	X4	X5	X6	X7	X8	X9	X10	X11	X12	X13	X14	X15	TOTAL	Y1	Y2	Y3	Y4	Y5	Y6	Y7	Y8	Y9	Y10	Y11	Y12	Y13	Y14	Y15	TOTAL	Z1	Z2	Z3	Z4	Z5	Z6	Z7	Z8	Z9	Z10	Z11	Z12	Z13	Z14
1	SEL	4	R1	4	4	3	3	3	3	3	4	4	3	3	4	4	3	4	52	4	3	3	3	3	3	3	3	3	3	3	3	3	3	3	46	3	3	3	3	3	3	3	3	3	3	3	3	3	3
2	SEL	4	R2	3	4	3	3	3	3	4	3	4	4	4	3	4	3	3	51	4	3	3	3	3	3	3	3	3	3	4	3	4	4	4	50	3	3	4	3	3	3	3	3	3	3	4	3	3	4
3	SEL	4	R3	3	4	3	3	4	3	3	4	3	4	3	4	3	3	3	50	4	4	4	4	4	4	4	4	3	4	4	3	3	4	4	57	4	4	3	3	3	4	3	4	3	3	4	4	4	4
4	SEL	4	R4	3	3	4	4	3	3	3	4	3	4	4	4	3	3	3	51	3	4	3	3	3	3	3	3	4	4	4	3	3	3	3	49	3	3	3	3	3	3	3	3	3	3	3	3	3	3
5	SEL	4	R5	4	4	4	3	4	3	3	4	4	4	4	4	4	4	3	56	3	4	4	3	4	4	4	4	3	4	4	4	4	4	3	56	4	4	4	4	3	4	4	4	4	4	4	4	4	4
6	SEL	4	R6	4	4	4	3	4	4	4	4	4	4	4	4	4	4	4	59	4	4	4	3	4	3	3	4	3	4	3	4	4	4	4	55	4	4	3	4	4	4	4	4	4	4	4	4	4	4
7	SEL	4	R7	3	3	4	3	3	3	3	4	4	4	4	4	4	4	4	54	3	3	3	3	3	3	3	3	3	3	3	3	3	4	3	46	3	3	3	3	3	3	3	4	3	3	3	3	3	3
8	SEL	4	R8	4	3	4	3	4	4	4	4	4	4	4	4	4	4	4	58	4	4	3	4	4	4	4	3	4	4	4	4	4	4	4	58	4	4	3	4	4	4	4	4	4	4	4	4	4	4
9	SEL	4	R9	3	4	4	4	4	3	4	4	4	4	4	4	3	3	4	56	4	4	4	3	4	4	4	3	3	3	4	4	4	4	4	56	4	4	3	4	4	4	3	3	4	3	3	4	4	4
10	SEL	4	R10	4	3	4	3	3	3	4	4	3	3	3	4	3	3	3	50	3	3	3	3	3	3	3	3	3	3	3	3	3	3	3	45	3	3	3	3	3	3	3	3	3	3	3	3	3	4
11	SEL	4	R11	4	4	4	3	4	4	4	4	4	3	4	3	4	4	4	57	3	3	3	3	4	3	4	3	3	3	4	3	3	3	3	48	4	4	3	4	4	3	3	3	3	3	4	3	4	4
12	SEL	4	R12	4	4	4	4	4	4	4	4	4	4	4	4	4	4	4	60	4	4	4	4	4	4	4	4	4	4	4	4	4	4	4	60	4	4	4	4	4	4	4	4	4	4	4	4	4	4
13	SEL	4	R13	4	3	3	4	4	4	4	4	3	4	3	3	3	4	4	54	3	4	3	4	3	4	4	4	3	4	4	3	4	4	4	55	3	4	3	3	3	4	4	3	4	4	4	3	4	4
14	SEL	4	R14	3	3	4	4	4	4	4	4	4	4	4	4	4	4	4	58	4	4		4	4	4	4	4	4	4	4	4	4	4	4	56	4	4	4	4	4	3	4	3	4	4	4	4	4	4
15	SEL	4	R15	3	4	4	4	4	4	3	3	4	3	4	3	4	4	4	55	3	4	4	4	4	3	3	4	3	3	3	3	3	3	3	50	3	3	3	4	3	4	3	3	3	3	3	3	3	4
16	SEL	4	R16	3	4	4	3	3	3	4	4	4	3	3	4	3	4	4	53	4	4	4	3	4	4	4	4	3	3	3	4	3	4	3	54	3	3	3	4	4	4	4	4	4	4	4	3	4	4
17	SEL	4	R17	3	3	3	3	3	3	3	3	3	3	3	3	3	3	3	45	3	3	3	3	3	3	3	3	3	3	3	3	3	4	3	46	3	3	3	3	3	3	3	3	3	3	3	3	3	3
18	SEL	4	R18	3	3	4	3	4	4	4	4	3	4	3	3	4	4	3	53	4	4	3	3	4	4	3	3	4	4	4	3	4	4	4	55	4	4	4	4	4	3	3	3	4	3	3	4	4	3
19	SEL	4	R19	3	3	3	3	3	3	3	4	4	4	3	3	3	3	3	48	3	3	3	3	3	3	3	3	3	3	3	3	3	3	3	45	3	3	3	3	3	4	3	4	3	3	3	4	3	4
20	SEL	4	R20	4	4	4	4	4	4	4	4	4	4	4	4	4	4	4	60	4	4	4	4	4	4	4	3	4	4	4	4	4	4	4	59	4	4	4	4	4	4	4	4	4	4	4	4	4	4
21	SEL	4	R21	3	4	4	3	3	3	4	4	4	3	3	3	4	4	4	53	3	4	3	3	3	3	4	3	3	4	4	4	3	3	4	51	3	3	3	3	4	3	4	4	3	4	3	3	3	4
22	SEL	4	R22	4	3	4	3	3	3	4	3	4	4	4	4	3	4	3	53	3	3	3	3	3	3	3	3	3	4	4	3	3	3	4	48	3	4	3	4	3	4	4	4	4	3	3	4	3	4
23	SEL	4	R23	3	3	4	3	4	4	4	4	4	3	3	4	4	3	4	54	3	3	3	3	3	3	3	3	3	3	3	4	4	4	4	49	3	3	4	3	4	4	4	3	4	3	4	4	4	4
24	SEL	4	R24	3	4	4	3	4	4	4	4	4	3	4	4	4	4	4	57	3	3	3	3	3	3	3	3	3	4	3	3	4	3	3	47	4	4	3	4	3	3	4	3	3	4	3	4	4	4
25	SEL	4	R25	3	4	4	4	4	4	4	4	3	3	3	3	4	3	3	53	4	3	4	3	4	4	4	3	4	4	3	3	4	4	4	55	4	4	4	3	3	4	4	3	4	4	3	3	4	4
26	SEL	4	R26	4	4	4	4	4	4	4	4	4	4	4	4	4	4	4	60	4	3	3	3	3	3	4	3	4	3	3	4	4	4	4	52	3	4	3	4	4	4	4	3	4	3	4	4	3	4
27	SEL	5	R27	3	3	4	3	4	3	3	4	3	4	4	4	4	3	3	52	3	3	3	3	3	3	3	3	3	3	3	3	3	4	3	46	3	4	3	3	3	3	3	3	3	3	3	3	3	3
28	SEL	5	R28	4	4	4	3	4	4	4	4	4	4	4	4	4	4	4	59	4	3	4	3	4	4	4	3	3	4	3	4	4	4	4	55	4	4	3	4	4	4	4	4	4	4	4	4	4	4
29	SEL	5	R29	3	3	4	4	3	4	4	4	3	4	4	4	4	3	4	55	4	4	4	4	4	3	4	4	3	4	4	4	4	4	4	58	4	4	4	4	3	3	3	4	4	3	4	4	4	3
30	SEL	5	R30	4	3	4	4	3	4	4	4	4	4	4	3	4	4	4	57	3	4	4	3	4	4	4	3	4	4	4	4	4	4	4	57	4	4	3	4	4	4	4	4	4	4	3	3	3	4
31	SEL	5	R31	3	3	4	3	4	4	4	4	4	3	3	4	4	4	4	55	3	4	3	4	3	4	3	3	3	4	4	4	3	4	4	53	4	4	3	4	4	3	3	4	3	3	3	3	4	4
32	SEL	5	R32	4	3	4	3	4	4	3	4	4	4	3	3	4	4	4	55	3	3	3	4	4	4	4	4	3	4	4	4	4	4	4	56	4	4	3	4	4	4	4	4	4	4	4	3	4	4
33	SEL	5	R33	3	3	3	3	3	3	3	3	3	3	3	3	3	3	3	45	3	3	3	3	3	3	3	3	3	3	3	3	3	4	3	46	3	4	3	3	4	4	3	4	4	4	4	4	4	4
34	SEL	5	R34	4	4	4	3	4	4	4	4	4	4	3	4	4	4	4	58	3	4	3	4	3	4	4	4	4	4	4	4	4	4	4	57	4	4	4	4	4	4	4	4	4	4	4	4	4	4
35	SEL	5	R35	3	4	4	4	3	4	4	4	4	4	4	4	4	4	4	58	4	3	3	3	4	4	4	3	4	4	4	4	4	4	4	56	4	4	3	3	4	4	3	3	4	4	4	4	4	4
36	SEL	5	R36	4	4	4	3	4	4	3	4	3	4	4	4	4	3	4	56	4	4	3	4	4	4	4	4	3	4	4	4	4	4	4	58	4	4	3	4	4	4	4	4	4	4	4	3	4	4
37	SEL	5	R37	3	3	3	3	4	4	4	4	3	4	3	3	3	3	4	51	4	4	3	3	4	3	3	4	3	3	3	3	3	4	3	50	3	3	3	3	3	4	3	4	3	3	3	3	3	3
38	SEL	5	R38	4	3	4	4	4	4	3	4	4	3	3	4	4	4	3	55	3	3	3	3	3	3	3	3	3	4	3	4	4	4	4	50	3	3	3	3	3	4	4	4	3	3	3	3	3	4
39	SEL	5	R39	3	3	4	3	3	4	3	4	3	4	3	3	3	3	4	50	3	3	3	3	3	4	3	3	4	4	4	3	4	4	4	52	4	3	4	4	3	3	4	3	4	3	4	3	4	4
40	SEL	5	R40	3	3	4	3	3	3	4	4	3	4	3	4	3	3	4	51	3	3	4	3	3	3	4	4	3	3	3	3	3	4	4	50	3	3	3	3	4	4	4	3	4	4	4	3	4	4
41	SEL	5	R41	3	3	3	4	3	3	3	4	3	3	3	3	3	3	3	47	3	3	3	3	3	3	3	3	3	3	3	3	3	4	3	46	4	3	3	3	4	4	3	4	3	3	4	3	3	4
42	SEL	5	R42	4	4	3	4	4	4	4	4	4	4	4	4	4	4	4	59	3	4	4	4	4	4	4	3	4	4	4	4	4	4	4	58	4	4	4	4	4	4	4	4	4	4	4	4	4	4
43	SEL	5	R43	3	3	3	3	3	3	3	3	3	4	3	3	3	3	3	46	3	3	3	3	3	3	3	3	3	3	3	3	3	4	3	46	3	3	3	3	3	3	3	3	3	3	3	3	3	3
44	SEL	5	R44	3	3	3	3	4	3	4	4	3	3	3	4	3	3	3	49	3	4	4	3	4	3	3	4	3	3	3	4	4	4	4	53	3	3	3	3	3	3	3	4	3	3	3	3	3	4
45	SEL	5	R45	3	4	4	3	4	4	4	4	3	3	3	4	4	4	4	55	4	4	4	3	4	4	3	4	4	4	3	4	4	3	4	56	4	4	3	4	4	4	4	4	4	3	4	4	3	4
46	SEL	5	R46	4	3	4	3	3	3	3	4	3	4	3	4	3	3	3	50	4	3	3	3	3	3	3	4	3	3	3	3	3	4	3	48	3	4	3	3	4	3	3	3	4	3	4	3	3	3
47	SEL	5	R47	4	3	3	3	3	4	4	4	4	3	3	4	3	3	4	52	3	4	3	3	4	3	3	4	4	3	3	3	4	4	3	51	3	3	2	2	3	3	4	3	3	3	3	3	4	4
48	SEL	5	R48	4	3	4	4	4	4	4	4	4	4	4	4	3	4	4	58	3	3	4	3	3	3	3	3	4	4	4	3	4	4	4	52	4	4	3	4	3	3	4	3	3	4	3	3	4	4
49	SEL	5	R49	3	4	3	3	3	3	3	4	3	3	3	3	3	3	3	47	3	4	3	3	3	3	3	3	3	3	3	3	3	3	3	46	3	3	3	3	3	3	3	3	3	3	3	3	3	3
50	SEL	5	R50	3	3	3	4	4	4	3	4	4	4	4	4	4	4	4	56	4	3	3	3	4	3	3	4	3	4	3	3	4	4	4	52	4	4	4	4	3	4	4	4	4	3	4	3	4	4
51	NON	4	R55	3	2	3	2	3	2	3	3	3	3	3	4	4	4	2	44	3	3	3	2	2	2	3	1	3	2	2	3	3	3	3	38	3	3	2	2	3	3	3	2	3	3	3	1	4	3
52	NON	4	R56	2	2	3	2	3	3	3	3	4	3	3	3	3	3	3	43	3	3	3	2	3	3	3	2	3	3	4	3	3	3	3	44	3	3	3	3	3	3	3	3	3	4	3	3	3	4
53	NON	4	R57	3	2	3	2	3	3	1	4	3	3	3	3	3	3	3	42	3	1	2	3	2	2	3	1	3	3	3	4	3	3	3	39	3	4	3	3	3	3	3	4	3	2	3	4	3	3
54	NON	4	R58	3	2	3	2	3	3	3	3	3	3	3	3	3	3	3	43	3	3	3	3	3	3	3	2	3	4	3	3	3	3	3	45	3	3	3	3	4	3	4	3	4	4	3	3	3	3
55	NON	4	R59	3	2	3	2	3	3	3	3	3	3	3	3	3	3	3	43	2	3	2	3	2	3	3	3	3	3	3	3	3	3	3	42	3	2	2	3	4	4	3	3	3	3	3	3	3	3
56	NON	4	R60	2	2	3	2	3	3	3	4	3	3	3	4	3	3	3	44	2	4	3	3	3	3	3	3	3	3	3	3	3	3	3	45	3	3	3	3	3	4	4	4	4	3	3	3	4	4
57	NON	4	R61	3	2	3	2	3	3	3	3	4	3	3	3	4	3	3	45	3	3	2	3	3	4	3	3	3	4	3	3	3	3	2	45	3	3	3	2	3	4	3	1	3	3	3	2	3	3
58	NON	4	R62	3	2	3	2	3	3	3	4	3	3	3	4	3	3	3	45	3	4	3	3	2	3	3	1	2	3	3	3	3	3	3	42	4	3	2	3	4	4	3	3	3	3	3	4	3	4
59	NON	4	R63	2	2	1	2	3	3	3	3	3	3	3	3	3	3	3	40	3	2	3	3	3	3	2	3	3	3	3	3	3	3	3	43	1	3	1	4	3	4	4	2	3	4	2	3	2	3
60	NON	4	R64	3	2	3	2	2	3	3	4	3	3	3	4	3	3	3	44	3	4	3	3	4	3	3	3	3	3	3	3	3	3	3	47	3	3	3	3	3	4	3	4	3	3	3	3	3	4
61	NON	4	R65	3	2	3	2	3	3	3	4	3	3	3	4	3	3	3	45	3	4	3	3	4	3	3	2	2	3	3	3	3	4	3	46	3	3	2	3	3	4	3	3	3	3	3	3	3	4
62	NON	4	R66	3	2	3	2	3	3	3	4	3	3	3	4	3	3	3	45	3	4	3	2	4	3	3	4	2	3	3	3	3	4	3	47	2	3	2	3	3	4	3	3	3	3	3	4	3	4
63	NON	4	R67	3	2	3	2	2	3	3	4	3	3	3	3	3	3	3	43	3	4	3	3	2	3	3	4	3	3	4	3	3	4	3	48	3	3	3	3	3	3	3	4	3	3	3	3	3	4
64	NON	4	R68	3	2	3	2	3	3	3	4	3	3	3	4	3	2	3	44	3	2	3	3	2	3	3	2	3	4	3	4	3	2	3	43	3	3	3	3	4	4	3	4	4	4	4	3	4	4
65	NON	4	R69	3	2	3	2	3	3	3	4	3	3	3	2	3	3	3	43	3	3	3	3	3	3	3	3	3	3	3	3	4	3	3	46	3	3	3	3	3	4	3	3	3	3	3	3	3	3
66	NON	4	R70	3	2	3	2	3	3	3	4	3	3	2	3	3	1	4	42	3	4	3	3	3	3	2	3	3	1	3	3	3	3	3	43	3	2	3	3	3	2	3	3	3	3	3	3	3	3
67	NON	4	R71	3	2	3	2	3	3	4	4	3	3	3	3	3	3	3	45	3	2	3	3	3	3	3	1	3	4	3	3	4	3	3	44	3	4	2	3	3	3	3	3	3	3	3	3	3	4
68	NON	4	R72	3	2	3	2	2	3	3	4	4	3	3	3	3	3	3	44	2	3	3	2	3	3	3	3	3	3	3	3	3	3	3	43	4	3	3	3	3	3	3	3	3	3	3	3	3	3
69	NON	4	R73	3	2	3	1	3	2	3	4	3	3	2	4	3	1	3	40	3	4	3	3	4	3	3	2	3	3	3	3	3	3	3	46	3	3	2	3	4	3	2	3	3	4	4	3	3	3
70	NON	4	R74	2	3	3	2	3	3	3	3	3	3	2	4	3	2	3	42	3	3	3	3	4	3	3	2	3	3	3	2	3	3	3	44	3	3	3	3	3	3	3	3	3	3	3	3	3	3
71	NON	4	R75	3	2	3	2	3	3	3	4	3	3	4	3	3	1	4	44	3	3	3	3	3	3	3	3	3	3	3	3	3	2	3	44	3	3	2	3	3	4	4	4	4	4	3	2	3	4
72	NON	4	R76	3	2	3	2	2	3	3	4	3	3	3	1	3	3	3	41	3	3	3	2	3	3	3	3	3	3	3	3	3	4	3	45	3	3	3	3	3	2	2	3	4	3	3	3	3	4
73	NON	4	R77	3	2	3	2	3	3	3	4	3	3	3	3	3	3	3	44	3	3	3	3	3	3	3	3	3	3	3	3	3	4	3	46	3	3	2	3	3	3	3	3	4	3	3	3	3	3
74	NON	4	R78	3	2	3	2	2	3	3	4	3	3	3	3	3	3	3	43	3	2	3	2	3	3	3	2	3	3	3	3	4	4	4	45	3	4	3	4	4	4	4	3	4	4	4	2	3	4
75	NON	4	R79	3	2	3	2	3	3	3	4	3	3	3	3	3	3	3	44	3	3	3	3	4	3	3	2	3	3	3	3	4	4	3	47	4	3	3	4	4	4	3	4	4	3	4	3	3	4
76	NON	4	R80	3	2	3	1	3	3	4	4	3	3	1	4	3	3	3	43	3	4	1	3	3	3	4	3	3	3	3	3	4	3	3	46	1	3	3	4	3	3	4	3	3	4	3	3	3	2
77	NON	4	R81	3	2	3	1	2	3	3	4	3	3	3	4	3	3	3	43	2	3	2	3	4	3	2	3	3	3	3	3	3	3	3	43	3	4	3	3	3	4	4	3	4	4	3	3	4	4
78	NON	5	R82	2	2	3	1	2	3	3	4	3	2	3	2	3	3	3	39	2	4	3	2	3	3	3	1	3	3	3	4	3	2	4	43	3	3	4	4	3	3	3	3	3	3	3	4	3	3
79	NON	5	R83	3	3	3	2	2	3	3	4	3	3	1	2	3	3	3	41	2	4	3	2	3	2	3	2	3	3	3	3	3	4	3	43	3	4	4	3	3	4	4	4	2	4	4	4	4	4
80	NON	5	R84	3	2	3	2	3	3	3	4	2	2	3	2	3	3	3	41	3	2	3	3	3	2	3	2	2	3	3	3	3	4	3	42	3	3	2	3	3	4	3	3	3	3	3	4	3	4
81	NON	5	R85	4	1	3	1	3	3	4	4	3	3	3	3	3	3	3	44	3	4	3	2	3	3	3	2	3	3	3	3	3	3	3	44	3	3	2	3	3	3	3	3	3	3	3	3	3	3
82	NON	5	R86	3	2	4	1	3	3	4	4	3	3	2	3	3	3	3	44	3	3	3	3	3	3	3	2	3	3	3	3	3	3	3	44	3	3	3	3	3	3	3	3	3	3	3	3	3	3
83	NON	5	R87	2	2	3	2	2	3	4	4	3	3	3	3	3	3	3	43	3	2	3	2	3	3	2	3	3	3	3	3	3	3	3	42	3	3	2	3	4	3	3	4	4	3	2	4	3	4
84	NON	5	R88	3	2	3	1	3	3	3	4	3	2	3	4	3	3	3	43	3	3	2	4	3	3	2	3	3	3	2	3	3	3	3	43	3	3	3	3	3	4	3	3	3	3	3	4	3	4
85	NON	5	R89	3	2	3	2	3	3	3	4	3	3	1	4	3	3	4	44	3	2	2	2	2	3	3	1	3	3	3	3	3	4	4	41	3	3	2	2	3	3	3	4	3	3	3	4	3	3
86	NON	5	R90	3	2	3	2	3	3	3	4	3	3	1	3	3	3	3	42	3	3	3	3	2	3	3	2	3	4	4	3	3	4	3	46	3	3	3	3	4	4	4	4	3	3	3	4	3	3
87	NON	5	R91	1	1	3	1	2	2	4	3	2	3	3	2	2	3	2	34	2	1	3	3	2	2	2	3	3	2	2	2	2	1	3	33	3	3	1	3	3	2	3	3	1	2	3	4	3	3
88	NON	5	R92	3	2	4	2	3	3	3	4	3	3	3	4	3	3	3	46	3	4	3	3	4	3	2	2	3	2	3	3	2	4	4	45	3	3	2	3	3	1	3	4	4	3	4	3	4	4
89	NON	5	R93	2	2	4	2	3	3	3	4	3	3	2	2	3	3	3	42	3	3	2	3	2	3	3	2	3	4	3	3	3	3	3	43	3	3	2	3	3	3	3	3	3	3	2	3	3	3
90	NON	5	R94	3	2	4	2	2	3	3	4	3	3	3	3	4	3	3	45	3	2	3	3	3	3	3	2	3	3	3	3	3	3	3	43	3	3	3	3	3	3	3	3	3	3	3	3	3	3
91	NON	5	R95	3	2	3	2	3	3	3	4	4	3	3	4	3	3	3	46	3	2	3	2	2	4	2	3	4	3	4	4	4	3	3	46	3	3	3	3	3	4	4	4	4	4	4	4	4	4
92	NON	5	R96	3	2	3	2	2	3	3	4	3	4	3	4	3	3	1	43	3	4	3	3	4	3	3	2	2	3	3	4	4	4	4	49	3	3	2	3	4	4	4	4	4	4	4	3	4	4
93	NON	5	R97	3	2	3	2	2	3	3	4	3	4	3	2	3	3	4	44	3	4	3	3	4	4	3	2	3	3	3	3	3	3	3	47	3	4	4	3	3	4	4	4	3	3	4	4	3	4
94	NON	5	R98	3	1	3	1	2	3	3	4	3	3	3	4	3	3	3	42	3	3	3	3	3	3	3	1	2	3	3	4	3	3	4	44	3	3	3	4	3	4	4	3	3	3	4	3	3	4
95	NON	5	R99	1	2	4	1	3	2	3	4	3	3	3	1	3	3	3	39	3	3	3	3	4	3	3	3	3	4	3	3	3	3	3	47	4	4	2	3	3	3	4	4	4	4	4	1	4	3
96	NON	5	R100	3	1	3	2	2	3	3	3	3	4	3	3	3	3	3	42	2	4	3	3	2	3	3	4	3	3	3	3	3	4	4	47	4	3	3	3	3	3	3	3	3	3	2	3	4	4
97	NON	5	R101	2	2	3	1	2	3	3	4	3	3	3	4	3	3	3	42	3	3	3	2	4	3	3	2	3	3	3	3	3	2	3	43	3	3	3	3	3	3	3	3	3	3	2	3	3	3
98	NON	5	R102	2	2	4	2	3	3	3	3	3	3	4	4	4	3	4	47	2	2	3	3	2	3	3	1	4	4	4	3	3	3	3	43	3	3	3	3	3	3	3	3	3	3	3	2	3	3
99	NON	5	R103	3	2	3	2	3	3	3	4	3	3	3	4	3	3	3	45	3	4	3	3	4	3	3	4	3	3	3	3	3	4	3	49	3	3	1	3	3	2	3	4	3	3	3	4	3	4
100	NON	5	R104	3	2	4	2	3	3	4	4	4	3	2	3	3	3	3	46	3	3	3	3	3	3	3	3	3	3	3	3	3	3	3	45	3	3	3	3	3	3	3	3	3	3	3	3	3	2
[truncated: 2 more columns]

## Sheet: SCORE Per Variable
X	: SEL
Y	: Self Regulation
Z	: Altruistic Behavior
NOMOR	RESPONDEN	X	Y	Z
1	R1	1	46	45
2	R2	1	50	49
3	R3	1	57	54
4	R4	1	49	45
5	R5	1	56	59
6	R6	1	55	59
7	R7	1	46	46
8	R8	1	58	59
9	R9	1	56	54
10	R10	1	45	46
11	R11	1	48	52
12	R12	1	60	60
13	R13	1	55	54
14	R14	1	56	58
15	R15	1	50	48
16	R16	1	54	56
17	R17	1	46	45
18	R18	1	55	54
19	R19	1	45	50
20	R20	1	59	60
21	R21	1	51	51
22	R22	1	48	54
23	R23	1	49	55
24	R24	1	47	53
25	R25	1	55	55
26	R26	1	52	55
27	R27	1	46	46
28	R28	1	55	59
29	R29	1	58	55
30	R30	1	57	55
31	R31	1	53	52
32	R32	1	56	58
33	R33	1	46	56
34	R34	1	57	60
35	R35	1	56	56
36	R36	1	58	58
37	R37	1	50	47
38	R38	1	50	49
39	R39	1	52	54
40	R40	1	50	54
41	R41	1	46	52
42	R42	1	58	60
43	R43	1	46	45
44	R44	1	53	48
45	R45	1	56	57
46	R46	1	48	50
47	R47	1	51	46
48	R48	1	52	52
49	R49	1	46	45
50	R50	1	52	56
51	R55	2	38	41
52	R56	2	44	47
53	R57	2	39	47
54	R58	2	45	49
55	R59	2	42	45
56	R60	2	45	52
57	R61	2	45	43
58	R62	2	42	49
59	R63	2	43	41
60	R64	2	47	48
61	R65	2	46	47
62	R66	2	47	46
63	R67	2	48	47
64	R68	2	43	54
65	R69	2	46	46
66	R70	2	43	43
67	R71	2	44	47
68	R72	2	43	47
69	R73	2	46	47
70	R74	2	44	45
71	R75	2	44	50
72	R76	2	45	45
73	R77	2	46	45
74	R78	2	45	54
75	R79	2	47	54
76	R80	2	46	45
77	R81	2	43	53
78	R82	2	43	49
79	R83	2	43	55
80	R84	2	42	47
81	R85	2	44	44
82	R86	2	44	45
83	R87	2	42	48
84	R88	2	43	49
85	R89	2	41	46
86	R90	2	46	51
87	R91	2	33	39
88	R92	2	45	48
89	R93	2	43	43
90	R94	2	43	45
91	R95	2	46	55
92	R96	2	49	54
93	R97	2	47	53
94	R98	2	44	51
95	R99	2	47	50
96	R100	2	47	46
97	R101	2	43	44
98	R102	2	43	44
99	R103	2	49	45
100	R104	2	45	44

## Sheet: Figure
A1	Variable
B1	SEL
C1	NON SEL
A2	Self Regulation
B2	52
C2	44.16
A3	Altruistic Behavior
B3	52.92
C3	47.44
